# Supplementary material for: Development of a vocational rehabilitation intervention to support return-to-work and well-being following major trauma: a person-based approach
Source: PubMed Central journal article supplement (PMC11459317; doi:10.1136/bmjopen-2024-085724), 2024-10-04
Supplement: bmjopen-14-10-s002.pdf [file bmjopen-14-10-s002.pdf]

**Supplementary Figure 1: Risk of Bias Assessment RCTs**

|       |                        | Risk of bias domains                                                              |                                                                                   |                                                                                   |                                                                                   |                                                                                    |                                                                                     |                                                                                     |                                                                                     |
|-------|------------------------|-----------------------------------------------------------------------------------|-----------------------------------------------------------------------------------|-----------------------------------------------------------------------------------|-----------------------------------------------------------------------------------|------------------------------------------------------------------------------------|-------------------------------------------------------------------------------------|-------------------------------------------------------------------------------------|-------------------------------------------------------------------------------------|
|       |                        | D1                                                                                | D2                                                                                | D3                                                                                | D4                                                                                | D5                                                                                 | D6                                                                                  | D7                                                                                  | Overall                                                                             |
| Study | Sarajuuri et al., 2005 |  |  |  |  |  |  |  |  |
|       | Radford et al., 2013   |  |  |  |  |  |  |  |  |

Domains:

- D1: Bias due to confounding.
- D2: Bias due to selection of participants.
- D3: Bias in classification of interventions.
- D4: Bias due to deviations from intended interventions.
- D5: Bias due to missing data.
- D6: Bias in measurement of outcomes.
- D7: Bias in selection of the reported result.

Judgement

-  Serious
-  Moderate
-  Low
-  No information
