# Supplementary material for: Development of a vocational rehabilitation intervention to support return-to-work and well-being following major trauma: a person-based approach
Source: PubMed Central journal article supplement (PMC11459317; doi:10.1136/bmjopen-2024-085724), 2024-10-04

**Supplementary Figure 4: Flow diagram indicating psychological screening**

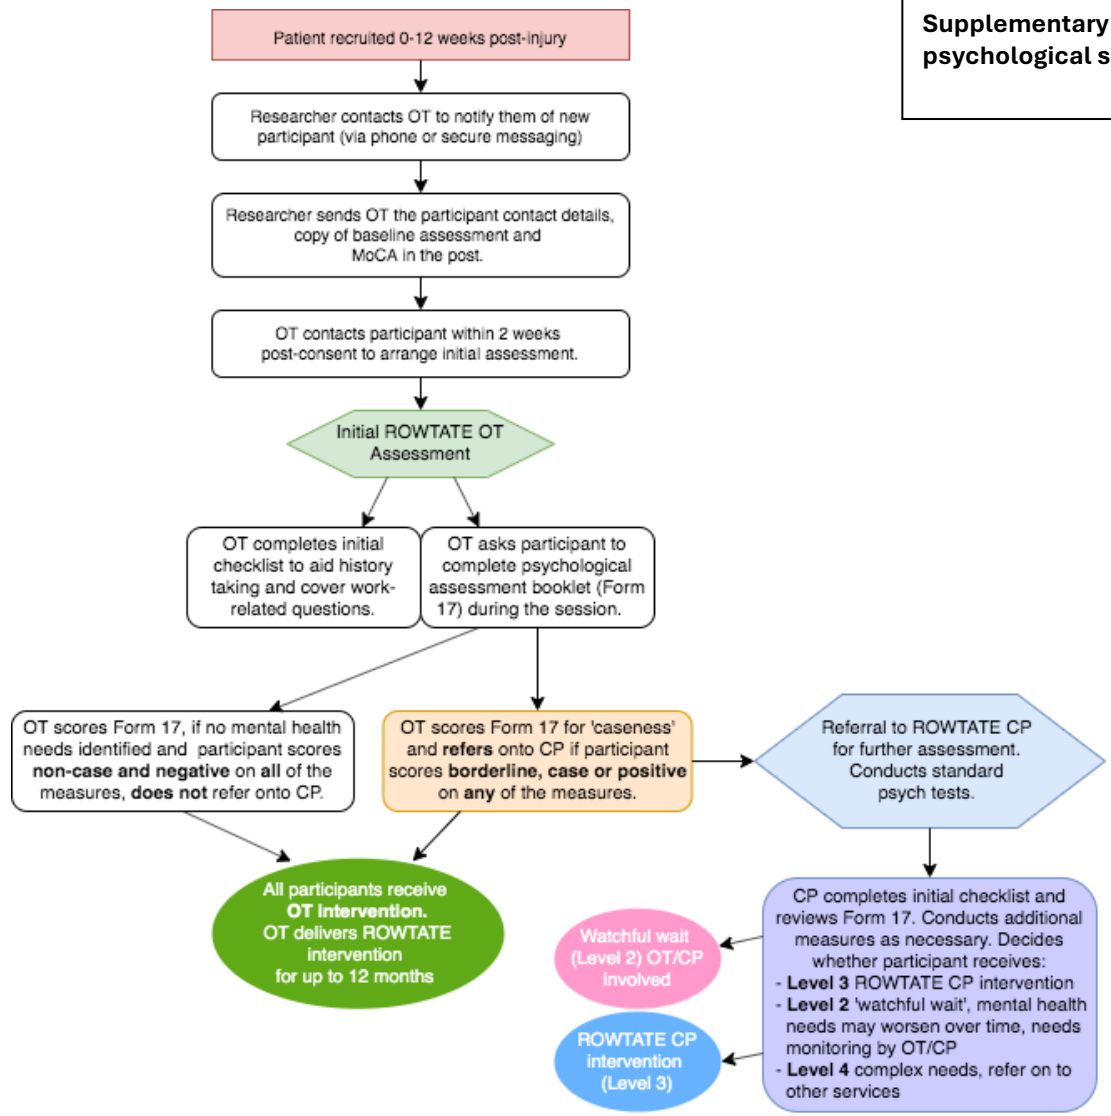

Supplement: bmjopen-14-10-s005.pdf [file bmjopen-14-10-s005.pdf]
